# Supplementary material
Source: PubMed Central journal article supplement (PMC6325174)
Supplement: f592ebdfd8ac1574e49bc6b83ce387d9_AAC.01396-18-s0001.pdf [file f592ebdfd8ac1574e49bc6b83ce387d9_AAC.01396-18-s0001.pdf]

## Supplementary data

**Table S1.** Oligonucleotides used to determine the genetic platforms of *bla*<sub>OXA-48-like</sub> genes

| Primer        | Sequence                         | Source or reference |
|---------------|----------------------------------|---------------------|
| IS1999 Pre Rv | 5'-ATCAAATTAGGGTGGGAAGCGCATC- 3' | This study          |
| IS1999 Pre Fw | 5'-ATCAGCGCCTTAGAGGCCAG -3'      | This study          |
| IS1999 Pre Ad | 5'-GATAGAAACAGAAGCCACTGGAG-3'    | This study          |
| OXA-48 end    | 5'-GAAGTGGTTAGCGCGTATTTGTG-3'    | This study          |
| LysR beg      | 5'-GCAGCGGCATTCACCTTTAC-3'       | This study          |

**Table S2.** Molecular epidemiology, characterization of antibiotic resistance genes and antibiotic susceptibility of 56 OXA-48-like-producing *K. pneumoniae* isolates

| Isolate number | Year | MLST | PFGE | Source             | Geographical area | Hospital | <i>bla</i> <sub>OXA-48-like</sub> | <i>bla</i> <sub>OXA-48-like</sub> plasmid type | Tn1999 variant | <i>bla</i> <sub>CTX-M-15</sub> | <i>bla</i> <sub>CTX-M-15</sub> plasmid type | Other <i>bla</i> genes (ESBL and pAmpC) | Antibiotic susceptibility <sup>a</sup> |     |     |     |     |     |     |     |     |     |     |     |     |    |     |     |     |
|----------------|------|------|------|--------------------|-------------------|----------|-----------------------------------|------------------------------------------------|----------------|--------------------------------|---------------------------------------------|-----------------------------------------|----------------------------------------|-----|-----|-----|-----|-----|-----|-----|-----|-----|-----|-----|-----|----|-----|-----|-----|
|                |      |      |      |                    |                   |          |                                   |                                                |                |                                |                                             |                                         | AMP                                    | AMC | PTZ | CFX | CAZ | CTX | FEP | AZT | IMI | MER | ERT | GEN | TOB | AK | CIP | T/S | FOS |
| 2014081        | 2014 | ST15 | P01  | Urine              | Seville           | H16      | <i>bla</i> <sub>OXA-48</sub>      | Incl                                           | ND             | Yes                            | IncR                                        | -                                       | R                                      | R   | R   | R   | R   | R   | R   | R   | I   | S   | R   | S   | S   | S  | R   | S   | R   |
| 2014033        | 2014 | ST15 | P02  | Urine              | Seville           | H16      | <i>bla</i> <sub>OXA-48</sub>      | Incl                                           | 2,4,5          | Yes                            | IncR                                        | -                                       | R                                      | R   | R   | R   | R   | R   | R   | R   | S   | S   | R   | S   | S   | S  | R   | I   | R   |
| 2014034        | 2014 | ST15 | P02  | Blood culture      | Seville           | H16      | <i>bla</i> <sub>OXA-48</sub>      | Incl                                           | 2,4,5          | Yes                            | IncR                                        | -                                       | R                                      | R   | R   | R   | R   | R   | R   | R   | S   | S   | R   | S   | S   | S  | R   | I   | R   |
| 2014057        | 2014 | ST15 | P02  | Urine              | Malaga            | H13      | <i>bla</i> <sub>OXA-48</sub>      | Incl                                           | 2,4,5          | Yes                            | IncR                                        | -                                       | R                                      | R   | R   | R   | R   | R   | R   | R   | S   | S   | R   | S   | R   | R  | R   | R   | R   |
| 2014127        | 2014 | ST15 | P02  | Surveillance study | Malaga            | H13      | <i>bla</i> <sub>OXA-48</sub>      | Incl                                           | 2,4,5          | Yes                            | IncR                                        | -                                       | R                                      | R   | R   | R   | R   | R   | R   | R   | S   | S   | R   | S   | R   | I  | R   | R   | S   |
| 2014128        | 2014 | ST15 | P02  | Wound              | Malaga            | H13      | <i>bla</i> <sub>OXA-48</sub>      | Incl                                           | 2,4,5          | Yes                            | IncR                                        | -                                       | R                                      | R   | R   | R   | R   | R   | R   | R   | S   | S   | R   | S   | R   | S  | R   | R   | R   |
| 2014129        | 2014 | ST15 | P02  | Wound              | Malaga            | H13      | <i>bla</i> <sub>OXA-48</sub>      | Incl                                           | 2,4,5          | Yes                            | IncR                                        | -                                       | R                                      | R   | R   | R   | R   | R   | R   | R   | S   | S   | R   | S   | R   | I  | R   | R   | S   |
| 2014180        | 2014 | ST15 | P02  | Urine              | Malaga            | H13      | <i>bla</i> <sub>OXA-48</sub>      | Incl                                           | 2,4,5          | No                             | -                                           | -                                       | R                                      | R   | R   | R   | R   | R   | R   | R   | S   | I   | R   | S   | R   | S  | R   | R   | S   |
| 2014185        | 2014 | ST15 | P02  | Surveillance study | Malaga            | H13      | <i>bla</i> <sub>OXA-48</sub>      | Incl                                           | 2,4,5          | No                             | -                                           | -                                       | R                                      | R   | R   | R   | R   | R   | R   | R   | I   | R   | R   | S   | R   | S  | R   | R   | R   |
| 2014187        | 2014 | ST15 | P02  | Blood culture      | Seville           | H16      | <i>bla</i> <sub>OXA-48</sub>      | Incl                                           | 2,4,5          | Yes                            | IncR                                        | -                                       | R                                      | R   | R   | R   | R   | R   | R   | R   | S   | S   | R   | S   | S   | S  | R   | S   | S   |
| 2015014        | 2015 | ST15 | P02  | Surveillance study | Malaga            | H13      | <i>bla</i> <sub>OXA-48</sub>      | Incl                                           | 2,4,5          | Yes                            | IncR                                        | -                                       | R                                      | R   | R   | R   | S   | I   | I   | S   | S   | I   | R   | S   | R   | R  | R   | I   | S   |
| 2015018        | 2015 | ST15 | P02  | Wound              | Malaga            | H13      | <i>bla</i> <sub>OXA-48</sub>      | Incl                                           | 2,4,5          | Yes                            | IncR                                        | -                                       | R                                      | R   | R   | R   | R   | R   | R   | R   | S   | S   | R   | S   | R   | S  | R   | R   | S   |
| 2015050        | 2015 | ST15 | P02  | Wound              | Malaga            | H13      | <i>bla</i> <sub>OXA-48</sub>      | Incl                                           | 2,4,5          | Yes                            | IncR                                        | -                                       | R                                      | R   | R   | R   | R   | R   | R   | R   | S   | S   | R   | S   | R   | S  | R   | R   | S   |
| 2014028        | 2014 | ST15 | P03  | Urine              | Seville           | H16      | <i>bla</i> <sub>OXA-48</sub>      | Incl                                           | 1              | Yes                            | IncR                                        | -                                       | R                                      | R   | R   | R   | R   | R   | R   | R   | S   | S   | R   | S   | R   | I  | R   | S   | R   |
| 2014058        | 2014 | ST15 | P03  | Urine              | Malaga            | H13      | <i>bla</i> <sub>OXA-48</sub>      | Incl                                           | 1              | Yes                            | IncR                                        | -                                       | R                                      | R   | R   | R   | R   | R   | R   | R   | R   | R   | R   | S   | R   | I  | R   | R   | R   |
| 2014145        | 2014 | ST15 | P03  | Sputum             | Malaga            | H8       | <i>bla</i> <sub>OXA-48</sub>      | Incl                                           | 1              | Yes                            | IncR                                        | -                                       | R                                      | R   | R   | R   | R   | R   | R   | R   | S   | S   | R   | S   | R   | I  | R   | R   | S   |
| 2014149        | 2014 | ST15 | P03  | Urine              | Malaga            | H8       | <i>bla</i> <sub>OXA-48</sub>      | Incl                                           | 1              | Yes                            | IncR                                        | -                                       | R                                      | R   | R   | R   | S   | S   | S   | S   | S   | S   | R   | S   | S   | S  | R   | S   | S   |
| 2014181        | 2014 | ST15 | P03  | Wound              | Malaga            | H13      | <i>bla</i> <sub>OXA-48</sub>      | Incl                                           | 1              | No                             | -                                           | -                                       | R                                      | R   | R   | R   | R   | R   | R   | R   | S   | S   | R   | S   | R   | S  | R   | R   | R   |
| 2015130        | 2015 | ST15 | P03  | Urine              | Granada           | H14      | <i>bla</i> <sub>OXA-48</sub>      | Incl                                           | 1              | Yes                            | IncR                                        | -                                       | R                                      | R   | R   | R   | R   | R   | R   | R   | S   | S   | R   | S   | R   | S  | R   | R   | R   |

|         |      |       |     |                    |         |     |                               |       |       |     |         |                             |   |   |   |   |   |   |   |   |   |   |   |   |   |   |   |   |   |   |
|---------|------|-------|-----|--------------------|---------|-----|-------------------------------|-------|-------|-----|---------|-----------------------------|---|---|---|---|---|---|---|---|---|---|---|---|---|---|---|---|---|---|
| 2015261 | 2015 | ST15  | P03 | Urine              | Seville | H5  | <i>bla</i> <sub>OXA-48</sub>  | Incl  | 1     | Yes | IncR    | -                           | R | R | R | R | R | R | R | R | S | I | R | S | R | S | R | R | R |   |
| 2015254 | 2015 | ST15  | P04 | Surveillance study | Cordoba | H6  | <i>bla</i> <sub>OXA-48</sub>  | Incl  | 2,4,5 | Yes | IncR    | -                           | R | R | R | R | R | R | R | R | S | S | R | S | R | S | R | R | S |   |
| 2014142 | 2014 | ST15  | P05 | Bile               | Malaga  | H8  | <i>bla</i> <sub>OXA-48</sub>  | Incl  | 1     | Yes | IncR    | -                           | R | R | R | R | R | R | R | R | S | S | R | R | R | S | R | R | S |   |
| 2014143 | 2014 | ST15  | P05 | Blood culture      | Malaga  | H8  | <i>bla</i> <sub>OXA-48</sub>  | Incl  | 1     | Yes | IncR    | -                           | R | R | R | R | R | R | R | R | S | S | R | R | R | S | R | R | S |   |
| 2014144 | 2014 | ST15  | P05 | Surveillance study | Malaga  | H8  | <i>bla</i> <sub>OXA-48</sub>  | Incl  | 1     | Yes | IncR    | -                           | R | R | I | R | R | R | R | R | S | S | R | R | R | S | R | R | S |   |
| 2014146 | 2014 | ST15  | P05 | Urine              | Malaga  | H8  | <i>bla</i> <sub>OXA-48</sub>  | Incl  | 1     | Yes | IncR    | -                           | R | R | R | R | R | R | R | R | S | S | R | R | R | S | R | R | R |   |
| 2014150 | 2014 | ST15  | P05 | Bile               | Malaga  | H8  | <i>bla</i> <sub>OXA-48</sub>  | Incl  | 1     | Yes | IncR    | -                           | R | R | R | R | R | R | R | R | S | S | R | R | R | S | R | R | S |   |
| 2015012 | 2015 | ST15  | P06 | Urine              | Seville | H16 | <i>bla</i> <sub>OXA-48</sub>  | Incl  | 2,4,5 | Yes | K7:A-B- | -                           | R | R | R | S | S | S | I | S | S | S | R | S | R | S | R | R | S |   |
| 2014088 | 2014 | ST15  | P07 | Blood culture      | Malaga  | H13 | <i>bla</i> <sub>OXA-48</sub>  | Incl  | 1     | Yes | IncR    | -                           | R | R | R | R | R | R | R | R | S | S | R | S | R | I | R | R | R |   |
| 2014090 | 2014 | ST15  | P07 | Urine              | Seville | H11 | <i>bla</i> <sub>OXA-48</sub>  | Incl  | 1     | Yes | IncR    | -                           | R | R | R | R | R | R | R | R | R | R | R | R | S | S | S | R | S | R |
| 2014126 | 2014 | ST11  | P08 | Urine              | Malaga  | H13 | <i>bla</i> <sub>OXA-48</sub>  | Incl  | 2,4,5 | Yes | IncR    | -                           | R | R | R | R | R | R | R | R | S | S | R | S | R | S | R | S | S |   |
| 2015067 | 2015 | ST11  | P08 | Surveillance study | Malaga  | H3  | <i>bla</i> <sub>OXA-48</sub>  | Incl  | 2,4,5 | Yes | IncR    | -                           | R | R | R | R | R | R | R | R | S | S | R | S | R | S | R | S | S |   |
| 2015083 | 2015 | ST11  | P09 | Surveillance study | Malaga  | H3  | <i>bla</i> <sub>OXA-245</sub> | Incl  | 1     | Yes | IncR    | -                           | R | R | R | R | R | R | R | R | S | S | R | S | R | S | R | R | R |   |
| 2015013 | 2015 | ST11  | P10 | Urine              | Malaga  | H13 | <i>bla</i> <sub>OXA-48</sub>  | Incl  | 2,4,5 | Yes | IncR    | -                           | R | R | R | R | R | R | R | R | S | S | R | S | R | S | R | S | S |   |
| 2015015 | 2015 | ST11  | P10 | Blood culture      | Malaga  | H13 | <i>bla</i> <sub>OXA-48</sub>  | Incl  | 2,4,5 | Yes | IncR    | -                           | R | R | R | R | R | R | R | R | S | S | R | S | R | S | R | S | S |   |
| 2014086 | 2014 | ST11  | P11 | Urine              | Cadiz   | H12 | <i>bla</i> <sub>OXA-48</sub>  | No TF | 2,4,5 | Yes | K1:A-B  | -                           | R | R | I | R | R | R | R | R | S | S | R | S | S | S | R | R | R |   |
| 2015259 | 2015 | ST11  | P11 | Urine              | Jaen    | H4  | <i>bla</i> <sub>OXA-48</sub>  | No TF | 2,4,5 | Yes | K1:A-B  | -                           | R | R | R | R | R | R | R | R | S | I | R | R | R | S | R | R | R |   |
| 2015016 | 2015 | ST1   | P12 | Surveillance study | Malaga  | H13 | <i>bla</i> <sub>OXA-245</sub> | Incl  | 2,4,5 | Yes | No TF   | <i>bla</i> <sub>CMY-2</sub> | R | R | R | R | R | R | R | R | S | S | R | R | R | S | R | I | S |   |
| 2015017 | 2015 | ST1   | P13 | Surveillance study | Malaga  | H13 | <i>bla</i> <sub>OXA-48</sub>  | Incl  | 2,4,5 | Yes | IncR    | <i>bla</i> <sub>CMY-2</sub> | R | R | R | R | R | R | R | R | S | S | R | R | R | S | R | I | R |   |
| 2015262 | 2015 | ST1   | P14 | Urine              | Jaen    | H1  | <i>bla</i> <sub>OXA-245</sub> | Incl  | 2,4,5 | Yes | No TF   | -                           | R | R | R | R | R | R | R | R | S | S | R | R | R | S | R | I | S |   |
| 2014063 | 2014 | ST147 | P15 | Sputum             | Cordoba | H9  | <i>bla</i> <sub>OXA-181</sub> | No TF | ND    | Yes | No TF   | -                           | R | R | R | R | R | R | R | R | S | R | R | R | R | R | R | S | R |   |
| 2014165 | 2014 | ST392 | P16 | Surveillance study | Seville | H16 | <i>bla</i> <sub>OXA-48</sub>  | IncM  | 1     | No  | -       | -                           | R | R | R | R | S | R | I | S | I | I | R | S | R | R | R | R | S |   |

|         |      |       |     |                    |         |     |                               |       |       |     |          |                              |   |   |   |   |   |   |   |   |   |   |   |   |   |   |   |   |   |
|---------|------|-------|-----|--------------------|---------|-----|-------------------------------|-------|-------|-----|----------|------------------------------|---|---|---|---|---|---|---|---|---|---|---|---|---|---|---|---|---|
| 2014171 | 2014 | ST392 | P17 | Urine              | Seville | H16 | <i>bla</i> <sub>OXA-48</sub>  | IncM  | 2,4,5 | No  | -        | -                            | R | R | R | S | S | S | S | S | S | S | R | S | R | R | R | R | S |
| 2015071 | 2015 | ST392 | P18 | Blood culture      | Seville | H15 | <i>bla</i> <sub>OXA-48</sub>  | No TF | 1     | Yes | K7:A:-B- | -                            | R | R | R | R | R | R | R | R | I | I | R | R | R | S | R | R | S |
| 2015116 | 2015 | ST392 | P18 | Blood culture      | Seville | H15 | <i>bla</i> <sub>OXA-48</sub>  | No TF | 1     | Yes | K7:A:-B- | -                            | R | R | R | R | R | R | R | R | S | I | R | R | R | S | R | R | R |
| 2014098 | 2014 | ST17  | P19 | Surveillance study | Seville | H16 | <i>bla</i> <sub>OXA-48</sub>  | Incl  | 2,4,5 | No  | -        | -                            | R | R | R | R | S | R | I | S | R | R | R | S | S | S | S | S | R |
| 2014102 | 2014 | ST17  | P19 | Catheter tip       | Seville | H16 | <i>bla</i> <sub>OXA-48</sub>  | Incl  | 2,4,5 | Yes | K7:A:-B- | -                            | R | R | R | R | R | R | R | R | S | S | R | S | R | I | R | R | R |
| 2015340 | 2015 | ST225 | P20 | Urine              | Jaen    | H4  | <i>bla</i> <sub>OXA-48</sub>  | Incl  | 2,4,5 | No  | -        | <i>bla</i> <sub>SHV-27</sub> | R | R | R | R | S | R | S | S | I | R | R | S | S | S | S | S | R |
| 2015110 | 2015 | ST251 | P21 | Ascitic fluid      | Malaga  | H3  | <i>bla</i> <sub>OXA-245</sub> | Incl  | 1     | No  | -        | -                            | R | R | R | S | S | S | S | S | S | S | R | S | S | S | S | S | S |
| 2015005 | 2015 | ST307 | P22 | Urine              | Seville | H10 | <i>bla</i> <sub>OXA-48</sub>  | Incl  | 2,4,5 | Yes | K7:A:-B- | -                            | R | R | R | R | R | R | R | R | S | S | R | R | R | S | R | R | S |
| 2015141 | 2015 | ST391 | P23 | Surveillance study | Seville | H16 | <i>bla</i> <sub>OXA-48</sub>  | Incl  | 2,4,5 | Yes | IncR     | -                            | R | R | R | R | R | R | R | R | S | S | R | R | S | S | S | R | S |
| 2015136 | 2015 | ST405 | P24 | Urine              | Malaga  | H3  | <i>bla</i> <sub>OXA-245</sub> | Incl  | 2,4,5 | Yes | K7:A:-B- | -                            | R | R | R | R | R | R | R | R | I | S | R | S | R | S | R | R | S |
| 2015108 | 2015 | ST431 | P03 | Urine              | Malaga  | H3  | <i>bla</i> <sub>OXA-48</sub>  | Incl  | 1     | Yes | IncR     | -                            | R | R | R | R | R | R | R | R | S | S | R | S | R | S | R | S | R |
| 2014025 | 2014 | ST753 | P25 | Wound              | Cadiz   | H2  | <i>bla</i> <sub>OXA-48</sub>  | Incl  | 2,4,5 | No  | -        | <i>bla</i> <sub>SHV-27</sub> | R | R | R | R | R | R | R | R | S | S | R | S | I | S | S | R | S |
| 2014139 | 2014 | ST836 | P26 | Surveillance study | Almeria | H7  | <i>bla</i> <sub>OXA-181</sub> | No TF | 1     | Yes | IncR     | -                            | R | R | R | R | R | R | R | R | I | I | R | R | R | I | R | R | R |
| 2014148 | 2014 | ST899 | P27 | Blood culture      | Malaga  | H8  | <i>bla</i> <sub>OXA-48</sub>  | Incl  | 2,4,5 | No  | -        | -                            | R | R | R | R | S | S | S | S | S | S | R | S | S | S | S | S | R |
| 2015128 | 2015 | ST974 | P28 | Urine              | Seville | H5  | <i>bla</i> <sub>OXA-48</sub>  | Incl  | 2,4,5 | No  | -        | -                            | R | R | R | R | S | S | S | S | S | I | R | S | S | S | S | S | S |

No TF: No transformants were obtained.

ND: Not determined.

<sup>a</sup>Antimicrobial susceptibility according to EUCAST breakpoints: S: susceptible, I: intermediate, R: resistant. AMP: ampicillin, AMC: amoxicillin/clavulanic acid, PTZ: piperacillin/tazobactam, CFX: cefuroxime, CAZ: ceftazidime, CTX: cefotaxime, FEP: cefepime, AZT: aztreonam, IMI: imipenem, MER: meropenem, ERT: ertapenem, GEN: gentamicin, TOB: tobramycin, AK: amikacin, CIP: ciprofloxacin, T/S: trimethoprim/sulfamethoxazole, FOS: fosfomicin.

**Figure S1.** Dendrogram of XbaI-PFGE illustrating genetic relationships between OXA-48-like-producing *K. pneumoniae* in different geographical areas of Andalusia, Spain. The dendrogram was created with Fingerprinting 3.0 software (Bio-Rad, Hercules, CA), using the Dice coefficient with position tolerance settings: 1% optimization and 1.2% position tolerance.

Dice (Opt:1.00%) (Tol 1.2%-1.2%) (H>0.0% S>0.0%) [0.0%-100.0%]  
**PFGE EC 25922** **PFGE EC 25922**

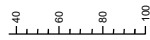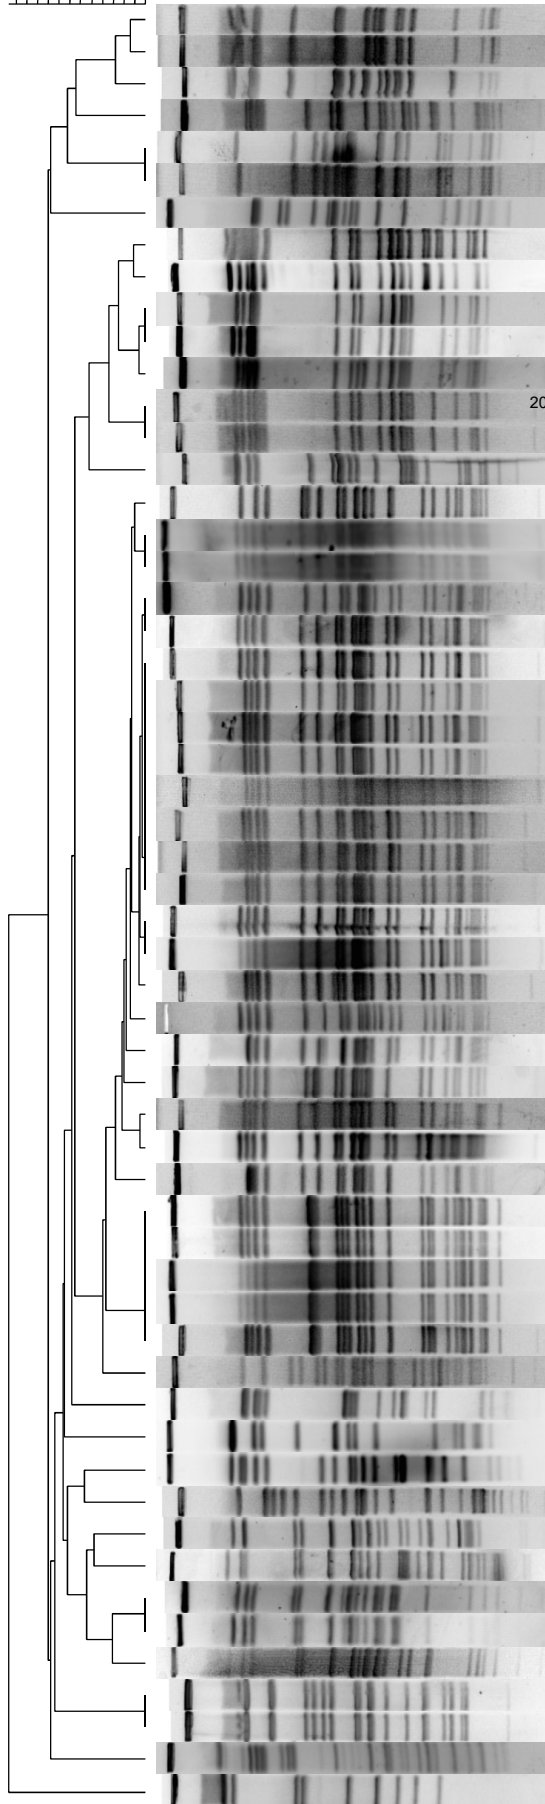

| Isolate | bla gene               | Clone | PFGE | Province | Hospital |
|---------|------------------------|-------|------|----------|----------|
| 2015016 | OXA-245+CTX-M-15+CMY-2 | ST1   | P12  | Malaga   | H13      |
| 2015017 | OXA-48+CTX-M-15+CMY-2  | ST1   | P13  | Malaga   | H13      |
| 2015262 | OXA-245+CTX-M-15       | ST1   | P14  | Jaen     | H1       |
| 2015005 | OXA-48+CTX-M-15        | ST307 | P22  | Seville  | H10      |
| 2014098 | OXA-48                 | ST17  | P19  | Seville  | H16      |
| 2014102 | OXA-48+CTX-M-15        | ST17  | P19  | Seville  | H16      |
| 2015136 | OXA-245+CTX-M-15       | ST405 | P24  | Malaga   | H3       |
| 2014086 | OXA-48+CTX-M-15        | ST11  | P11  | Cadiz    | H12      |
| 2015259 | OXA-48+CTX-M-15        | ST11  | P11  | Jaen     | H4       |
| 2014126 | OXA-48+CTX-M-15        | ST11  | P08  | Malaga   | H13      |
| 2015067 | OXA-48+CTX-M-15        | ST11  | P08  | Malaga   | H3       |
| 2015083 | OXA-245+CTX-M-15       | ST11  | P09  | Malaga   | H3       |
| 2015013 | OXA-48+CTX-M-15        | ST11  | P10  | Malaga   | H13      |
| 2015015 | OXA-48+CTX-M-15        | ST11  | P10  | Malaga   | H13      |
| 2015340 | OXA-48+SHV-27          | ST225 | P20  | Jaen     | H4       |
| 2014081 | OXA-48+CTX-M-15        | ST15  | P01  | Seville  | H16      |
| 2014033 | OXA-48+CTX-M-15+SHV-28 | ST15  | P02  | Seville  | H16      |
| 2014034 | OXA-48+CTX-M-15+SHV-28 | ST15  | P02  | Seville  | H16      |
| 2014180 | OXA-48                 | ST15  | P02  | Malaga   | H13      |
| 2014187 | OXA-48+CTX-M-15        | ST15  | P02  | Seville  | H16      |
| 2014057 | OXA-48+CTX-M-15        | ST15  | P02  | Malaga   | H13      |
| 2014127 | OXA-48+CTX-M-15        | ST15  | P02  | Malaga   | H13      |
| 2014128 | OXA-48+CTX-M-15        | ST15  | P02  | Malaga   | H13      |
| 2014129 | OXA-48+CTX-M-15        | ST15  | P02  | Malaga   | H13      |
| 2014185 | OXA-48                 | ST15  | P02  | Malaga   | H13      |
| 2015014 | OXA-48+CTX-M-15        | ST15  | P02  | Malaga   | H13      |
| 2015018 | OXA-48+CTX-M-15        | ST15  | P02  | Malaga   | H13      |
| 2015050 | OXA-48+CTX-M-15        | ST15  | P02  | Malaga   | H13      |
| 2014058 | OXA-48+CTX-M-15+SHV-28 | ST15  | P03  | Malaga   | H13      |
| 2014145 | OXA-48+CTX-M-15        | ST15  | P03  | Malaga   | H8       |
| 2014149 | OXA-48+CTX-M-15        | ST15  | P03  | Malaga   | H8       |
| 2014181 | OXA-48                 | ST15  | P03  | Malaga   | H13      |
| 2015130 | OXA-48+CTX-M-15+SHV-28 | ST15  | P03  | Granada  | H14      |
| 2015108 | OXA-48+CTX-M-15        | ST431 | P03  | Malaga   | H3       |
| 2014028 | OXA-48+CTX-M-15+SHV-28 | ST15  | P03  | Seville  | H16      |
| 2015261 | OXA-48+CTX-M-15        | ST15  | P03  | Seville  | H5       |
| 2015254 | OXA-48+CTX-M-15+SHV-28 | ST15  | P04  | Cordoba  | H6       |
| 2014142 | OXA-48+CTX-M-15+SHV-28 | ST15  | P05  | Malaga   | H8       |
| 2014143 | OXA-48+CTX-M-15        | ST15  | P05  | Malaga   | H8       |
| 2014144 | OXA-48+CTX-M-15        | ST15  | P05  | Malaga   | H8       |
| 2014146 | OXA-48+CTX-M-15        | ST15  | P05  | Malaga   | H8       |
| 2014150 | OXA-48+CTX-M-15        | ST15  | P05  | Malaga   | H8       |
| 2015012 | OXA-48+CTX-M-15+SHV-28 | ST15  | P06  | Seville  | H16      |
| 2015128 | OXA-48                 | ST974 | P28  | Seville  | H15      |
| 2014139 | OXA-181+CTX-M-15       | ST836 | P26  | Almeria  | H7       |
| 2014025 | OXA-48+SHV-27          | ST753 | P25  | Cadiz    | H2       |
| 2014148 | OXA-48                 | ST899 | P27  | Malaga   | H8       |
| 2014063 | OXA-181+CTX-M-15       | ST147 | P15  | Cordoba  | H9       |
| 2014171 | OXA-48                 | ST392 | P17  | Seville  | H16      |
| 2015071 | OXA-48+CTX-M-15        | ST392 | P18  | Seville  | H15      |
| 2015116 | OXA-48+CTX-M-15        | ST392 | P18  | Seville  | H15      |
| 2014165 | OXA-48                 | ST392 | P16  | Seville  | H16      |
| 2014088 | OXA-48+CTX-M-15+SHV-28 | ST15  | P07  | Malaga   | H13      |
| 2014090 | OXA-48+CTX-M-15        | ST15  | P07  | Seville  | H11      |
| 2015141 | OXA-48+CTX-M-15        | ST391 | P23  | Seville  | H16      |
| 2015110 | OXA-245                | ST251 | P21  | Malaga   | H3       |
